# Supplementary material
Source: HighWire-hosted journal article supplement (https://jech.bmj.com/content/78/2/121)
Supplement: inline-supplementary-material-1 [file inline-supplementary-material-1.pdf]

Table A: Weighted Sample Characteristics by Sexual Orientation and Gender Expression: Women, Add Health Wave V

|                                                                | n     | %     | Gender<br>Conforming<br>Heterosexual<br>% (n=5,456) | Gender<br>Nonconforming<br>Heterosexual<br>% (n=260) | Gender<br>Conforming<br>Sexual<br>Minority<br>% (n=565) | Gender<br>Nonconforming<br>Sexual<br>Minority<br>% (n=120) | P       |
|----------------------------------------------------------------|-------|-------|-----------------------------------------------------|------------------------------------------------------|---------------------------------------------------------|------------------------------------------------------------|---------|
| Total                                                          | 6,401 | 100.0 | 84.2                                                | 3.7                                                  | 10.0                                                    | 2.0                                                        | -       |
| Sociodemographic Characteristics                               |       |       |                                                     |                                                      |                                                         |                                                            |         |
| Sexual Orientation                                             |       |       |                                                     |                                                      |                                                         |                                                            |         |
| 100% heterosexual                                              | 5,162 | 80.0  | 91.3                                                | 84.4                                                 | 0.0                                                     | 0.0                                                        | p<0.001 |
| Mostly heterosexual                                            | 989   | 15.4  | 8.7                                                 | 15.6                                                 | 69.0                                                    | 31.2                                                       |         |
| Bisexual                                                       | 125   | 2.4   | 0.0                                                 | 0.0                                                  | 19.0                                                    | 23.2                                                       |         |
| Mostly homosexual                                              | 65    | 1.2   | 0.0                                                 | 0.0                                                  | 7.5                                                     | 21.9                                                       |         |
| 100% homosexual                                                | 60    | 0.9   | 0.0                                                 | 0.0                                                  | 4.6                                                     | 23.7                                                       |         |
| Gender Expression                                              |       |       |                                                     |                                                      |                                                         |                                                            |         |
| Conforming                                                     | 6,021 | 94.3  | 100.0                                               | 0.0                                                  | 100.0                                                   | 0.0                                                        | p<0.001 |
| Androgynous                                                    | 301   | 4.6   | 0.0                                                 | 89.8                                                 | 0.0                                                     | 62.6                                                       |         |
| Nonconforming                                                  | 79    | 1.1   | 0.0                                                 | 10.2                                                 | 0.0                                                     | 37.4                                                       |         |
| Race/Ethnicity                                                 |       |       |                                                     |                                                      |                                                         |                                                            |         |
| Non-Hispanic White                                             | 3,637 | 67.7  | 66.9                                                | 68.7                                                 | 72.2                                                    | 72.9                                                       | p<0.001 |
| Non-Hispanic Black                                             | 1,282 | 14.7  | 15.4                                                | 7.5                                                  | 11.9                                                    | 9.9                                                        |         |
| Hispanic                                                       | 907   | 11.0  | 11.2                                                | 7.3                                                  | 11.6                                                    | 7.9                                                        |         |
| Non-Hispanic Other                                             | 575   | 6.7   | 6.5                                                 | 16.6                                                 | 4.4                                                     | 9.2                                                        |         |
| Age (mean)                                                     | 6,401 | 37.3  | 37.4                                                | 37.5                                                 | 37.1                                                    | 36.9                                                       | p=0.025 |
| Parental Education                                             |       |       |                                                     |                                                      |                                                         |                                                            |         |
| Less than high school<br>diploma                               | 738   | 11.7  | 11.4                                                | 15.5                                                 | 11.9                                                    | 15.3                                                       | p=0.131 |
| High school diploma/GED                                        | 1,723 | 29.0  | 28.3                                                | 35.9                                                 | 30.7                                                    | 40.4                                                       |         |
| Some college                                                   | 1,372 | 22.0  | 22.4                                                | 14.7                                                 | 21.4                                                    | 20.7                                                       |         |
| Bachelor's degree or higher                                    | 2,252 | 32.2  | 32.9                                                | 28.9                                                 | 30.4                                                    | 16.5                                                       |         |
| Unknown education                                              | 316   | 5.1   | 5.0                                                 | 5.0                                                  | 5.6                                                     | 7.1                                                        |         |
| Received household assistance<br>before age 18, wave III or IV |       |       |                                                     |                                                      |                                                         |                                                            |         |
| No                                                             | 5,005 | 75.1  | 76.3                                                | 68.4                                                 | 70.0                                                    | 65.3                                                       | p=0.011 |
| Yes                                                            | 1,103 | 17.6  | 16.6                                                | 26.9                                                 | 19.7                                                    | 29.3                                                       |         |
| Unknown                                                        | 293   | 7.3   | 7.1                                                 | 4.8                                                  | 10.3                                                    | 5.4                                                        |         |
| Urbanicity                                                     |       |       |                                                     |                                                      |                                                         |                                                            |         |
| Metropolitan area                                              | 5,179 | 79.0  | 78.4                                                | 79.5                                                 | 82.8                                                    | 80.5                                                       | p=0.097 |
| Micropolitan/small<br>town/rural area                          | 786   | 14.1  | 14.3                                                | 18.4                                                 | 10.2                                                    | 14.2                                                       |         |
| Unknown                                                        | 436   | 7.0   | 7.2                                                 | 2.0                                                  | 7.0                                                     | 5.3                                                        |         |
| Census Region                                                  |       |       |                                                     |                                                      |                                                         |                                                            |         |
| Northeast                                                      | 722   | 10.7  | 10.8                                                | 8.5                                                  | 11.4                                                    | 8.3                                                        | p=0.036 |
| Midwest                                                        | 1,403 | 26.5  | 25.6                                                | 33.3                                                 | 28.9                                                    | 41.1                                                       |         |
| South                                                          | 2,413 | 38.4  | 39.4                                                | 40.2                                                 | 31.3                                                    | 29.6                                                       |         |
| West                                                           | 1,427 | 17.4  | 17.0                                                | 15.9                                                 | 21.4                                                    | 15.7                                                       |         |
| Unknown                                                        | 436   | 7.0   | 7.2                                                 | 2.0                                                  | 7.0                                                     | 5.3                                                        |         |
| Socioeconomic Indicators                                       |       |       |                                                     |                                                      |                                                         |                                                            |         |
| Educational Attainment                                         |       |       |                                                     |                                                      |                                                         |                                                            |         |
| Less than bachelor's degree                                    | 3,464 | 57.6  | 55.7                                                | 74.0                                                 | 63.6                                                    | 76.9                                                       | p<0.001 |
| Bachelor's degree or higher                                    | 2,937 | 42.4  | 44.3                                                | 26.0                                                 | 36.4                                                    | 23.1                                                       |         |
| Employment Status                                              |       |       |                                                     |                                                      |                                                         |                                                            |         |
| Employed                                                       | 5,251 | 79.5  | 79.5                                                | 78.1                                                 | 79.4                                                    | 79.0                                                       | p=0.081 |
| Unemployed                                                     | 335   | 6.1   | 5.7                                                 | 4.6                                                  | 9.5                                                     | 10.8                                                       |         |
| Not in the workforce                                           | 815   | 14.4  | 14.8                                                | 17.3                                                 | 11.1                                                    | 10.2                                                       |         |
| Personal Income                                                |       |       |                                                     |                                                      |                                                         |                                                            |         |
| <US\$10,000                                                    | 1,073 | 18.9  | 18.4                                                | 17.6                                                 | 22.7                                                    | 23.0                                                       | p=0.265 |
| >US\$10,000                                                    | 5,328 | 81.1  | 81.6                                                | 82.4                                                 | 77.3                                                    | 77.0                                                       |         |
| Poverty to Income Needs Ratio                                  |       |       |                                                     |                                                      |                                                         |                                                            |         |
| <100%                                                          | 945   | 16.5  | 15.6                                                | 25.3                                                 | 18.2                                                    | 29.6                                                       | p=0.003 |
| >100%                                                          | 5,456 | 83.5  | 84.4                                                | 74.7                                                 | 81.8                                                    | 70.4                                                       |         |
| Total Other Household Debt                                     |       |       |                                                     |                                                      |                                                         |                                                            |         |
| None                                                           | 862   | 13.2  | 14.1                                                | 12.5                                                 | 6.8                                                     | 8.0                                                        | p=0.005 |
| US\$1-US\$24,999                                               | 3,708 | 59.1  | 58.2                                                | 63.9                                                 | 64.2                                                    | 61.5                                                       |         |
| >US\$25,000                                                    | 1,831 | 27.7  | 27.7                                                | 23.7                                                 | 29.0                                                    | 30.5                                                       |         |
| Fell Behind on Paying Bills<br>Since 2008                      |       |       |                                                     |                                                      |                                                         |                                                            |         |
| No                                                             | 3,077 | 47.0  | 48.9                                                | 36.9                                                 | 37.4                                                    | 35.2                                                       | p<0.001 |
| Yes                                                            | 3,324 | 53.0  | 51.1                                                | 63.1                                                 | 62.6                                                    | 64.8                                                       |         |

|                                                               |       |      |      |      |      |      |         |
|---------------------------------------------------------------|-------|------|------|------|------|------|---------|
| Experienced Foreclosure, Eviction, or Repossession Since 2008 |       |      |      |      |      |      |         |
| No                                                            | 5,276 | 82.1 | 83.1 | 72.5 | 78.4 | 77.0 | p=0.006 |
| Yes                                                           | 1,125 | 17.9 | 16.9 | 27.5 | 21.6 | 23.0 |         |

Notes: n=6,401; Weighted column percentages are presented; Percentages may not add up to 100.0 due to rounding; \*P<0.05; \*\*P<0.01; \*\*\*P<0.001.

Table B: Weighted Sample Characteristics by Sexual Orientation and Gender Expression: Men, Add Health Wave V

|                                                               | n     | %     | Gender<br>Conforming<br>Heterosexual<br>% (n=4,502) | Gender<br>Nonconforming<br>Heterosexual<br>% (n=53) | Gender<br>Conforming<br>Sexual<br>Minority<br>% (n=252) | Gender<br>Nonconforming<br>Sexual<br>Minority<br>% (n=34) | P       |
|---------------------------------------------------------------|-------|-------|-----------------------------------------------------|-----------------------------------------------------|---------------------------------------------------------|-----------------------------------------------------------|---------|
| Total                                                         | 4,841 | 100.0 | 92.9                                                | 1.2                                                 | 4.8                                                     | 1.0                                                       | -       |
| Sociodemographic Characteristics                              |       |       |                                                     |                                                     |                                                         |                                                           |         |
| Sexual Orientation                                            |       |       |                                                     |                                                     |                                                         |                                                           |         |
| 100% heterosexual                                             | 4,411 | 90.9  | 96.6                                                | 93.7                                                | 0.0                                                     | 0.0                                                       | p<0.001 |
| Mostly heterosexual                                           | 226   | 5.0   | 3.4                                                 | 6.3                                                 | 34.2                                                    | 12.1                                                      |         |
| Bisexual                                                      | 35    | 0.9   | 0.0                                                 | 0.0                                                 | 15.6                                                    | 14.3                                                      |         |
| Mostly homosexual                                             | 44    | 0.5   | 0.0                                                 | 0.0                                                 | 9.7                                                     | 7.3                                                       |         |
| 100% homosexual                                               | 125   | 2.6   | 0.0                                                 | 0.0                                                 | 40.5                                                    | 66.3                                                      |         |
| Gender Expression                                             |       |       |                                                     |                                                     |                                                         |                                                           |         |
| Conforming                                                    | 4,754 | 97.8  | 100.0                                               | 0.0                                                 | 100.0                                                   | 0.0                                                       | p<0.001 |
| Androgynous                                                   | 62    | 1.6   | 0.0                                                 | 64.8                                                | 0.0                                                     | 82.1                                                      |         |
| Nonconforming                                                 | 25    | 0.6   | 0.0                                                 | 35.2                                                | 0.0                                                     | 17.9                                                      |         |
| Race/Ethnicity                                                |       |       |                                                     |                                                     |                                                         |                                                           |         |
| Non-Hispanic White                                            | 2,911 | 68.4  | 68.4                                                | 54.9                                                | 69.9                                                    | 75.3                                                      | p=0.577 |
| Non-Hispanic Black                                            | 712   | 12.6  | 12.7                                                | 13.4                                                | 11.5                                                    | 6.9                                                       |         |
| Hispanic                                                      | 671   | 11.2  | 11.0                                                | 14.5                                                | 13.1                                                    | 13.9                                                      |         |
| Non-Hispanic Other                                            | 547   | 7.9   | 7.9                                                 | 17.2                                                | 5.5                                                     | 3.8                                                       |         |
| Age (mean)                                                    | 4,841 | 37.6  | 37.5                                                | 37.6                                                | 37.6                                                    | 37.5                                                      | p=0.991 |
| Parental Education                                            |       |       |                                                     |                                                     |                                                         |                                                           |         |
| Less than high school diploma                                 | 455   | 8.8   | 8.1                                                 | 32.1                                                | 14.9                                                    | 22.9                                                      | p<0.001 |
| High school diploma/GED                                       | 1,314 | 30.1  | 30.3                                                | 35.2                                                | 21.8                                                    | 42.0                                                      |         |
| Some college                                                  | 958   | 19.9  | 19.8                                                | 11.9                                                | 23.7                                                    | 15.6                                                      |         |
| Bachelor's degree or higher                                   | 1,891 | 35.7  | 36.2                                                | 12.7                                                | 35.2                                                    | 19.4                                                      |         |
| Unknown education                                             | 223   | 5.5   | 5.6                                                 | 8.1                                                 | 4.4                                                     | 0.2                                                       |         |
| Received household assistance before age 18, wave III or IV   |       |       |                                                     |                                                     |                                                         |                                                           |         |
| No                                                            | 3,835 | 76.1  | 75.9                                                | 75.2                                                | 81.6                                                    | 73.2                                                      | p=0.520 |
| Yes                                                           | 702   | 14.8  | 14.9                                                | 21.0                                                | 10.4                                                    | 21.8                                                      |         |
| Unknown                                                       | 304   | 9.1   | 9.3                                                 | 3.8                                                 | 8.0                                                     | 5.0                                                       |         |
| Urbanicity                                                    |       |       |                                                     |                                                     |                                                         |                                                           |         |
| Metropolitan area                                             | 3,865 | 77.7  | 77.7                                                | 85.5                                                | 75.7                                                    | 77.8                                                      | p=0.804 |
| Micropolitan/small town/rural area                            | 582   | 13.8  | 13.7                                                | 7.0                                                 | 16.7                                                    | 17.6                                                      |         |
| Unknown                                                       | 394   | 8.6   | 8.7                                                 | 7.5                                                 | 7.6                                                     | 4.6                                                       |         |
| Census Region                                                 |       |       |                                                     |                                                     |                                                         |                                                           |         |
| Northeast                                                     | 579   | 12.1  | 12.2                                                | 10.9                                                | 11.3                                                    | 8.4                                                       | p=0.687 |
| Midwest                                                       | 1,048 | 25.1  | 24.5                                                | 34.7                                                | 31.8                                                    | 38.7                                                      |         |
| South                                                         | 1,753 | 38.3  | 38.8                                                | 28.5                                                | 32.0                                                    | 36.4                                                      |         |
| West                                                          | 1,067 | 15.9  | 15.8                                                | 18.4                                                | 17.3                                                    | 12.0                                                      |         |
| Unknown                                                       | 394   | 8.6   | 8.7                                                 | 7.5                                                 | 7.6                                                     | 4.6                                                       |         |
| Socioeconomic Indicators                                      |       |       |                                                     |                                                     |                                                         |                                                           |         |
| Educational Attainment                                        |       |       |                                                     |                                                     |                                                         |                                                           |         |
| Less than bachelor's degree                                   | 3,047 | 66.7  | 66.5                                                | 85.5                                                | 62.6                                                    | 80.8                                                      | p=0.030 |
| Bachelor's degree or higher                                   | 1,794 | 33.3  | 33.5                                                | 14.5                                                | 37.4                                                    | 19.2                                                      |         |
| Employment Status                                             |       |       |                                                     |                                                     |                                                         |                                                           |         |
| Employed                                                      | 4,340 | 88.1  | 88.9                                                | 72.2                                                | 80.9                                                    | 76.7                                                      | p=0.041 |
| Unemployed                                                    | 248   | 5.6   | 5.3                                                 | 13.9                                                | 9.9                                                     | 9.3                                                       |         |
| Not in the workforce                                          | 253   | 6.2   | 5.9                                                 | 13.9                                                | 9.2                                                     | 14                                                        |         |
| Personal Income                                               |       |       |                                                     |                                                     |                                                         |                                                           |         |
| <US\$10,000                                                   | 382   | 9.6   | 9.2                                                 | 17.5                                                | 11.8                                                    | 23.1                                                      | p=0.091 |
| >US\$10,000                                                   | 4,459 | 90.4  | 90.8                                                | 82.5                                                | 88.2                                                    | 76.9                                                      |         |
| Poverty to Income Needs Ratio                                 |       |       |                                                     |                                                     |                                                         |                                                           |         |
| <100%                                                         | 468   | 11.7  | 11                                                  | 43.2                                                | 11.5                                                    | 32                                                        | p<0.001 |
| >100%                                                         | 4,373 | 88.3  | 89                                                  | 56.8                                                | 88.5                                                    | 68                                                        |         |
| Total Other Household Debt                                    |       |       |                                                     |                                                     |                                                         |                                                           |         |
| None                                                          | 699   | 14.2  | 14.4                                                | 40.1                                                | 7.5                                                     | 0.3                                                       | p<0.001 |
| US\$1-US\$24,999                                              | 2,720 | 57.6  | 57.2                                                | 47.6                                                | 62.1                                                    | 86.1                                                      |         |
| >US\$25,000                                                   | 1,422 | 28.2  | 28.4                                                | 12.3                                                | 30.4                                                    | 13.6                                                      |         |
| Fell Behind on Paying Bills Since 2008                        |       |       |                                                     |                                                     |                                                         |                                                           |         |
| No                                                            | 2,672 | 53.3  | 53.9                                                | 60.2                                                | 40.9                                                    | 51.5                                                      | p=0.056 |
| Yes                                                           | 2,169 | 46.7  | 46.1                                                | 39.8                                                | 59.1                                                    | 48.5                                                      |         |
| Experienced Foreclosure, Eviction, or Repossession Since 2008 |       |       |                                                     |                                                     |                                                         |                                                           |         |
| No                                                            | 4,105 | 84.1  | 84.5                                                | 74.7                                                | 77.8                                                    | 83.7                                                      | p=0.147 |

---

|     |  |     |      |  |      |      |      |      |
|-----|--|-----|------|--|------|------|------|------|
| Yes |  | 736 | 15.9 |  | 15.5 | 25.3 | 22.2 | 16.3 |
|-----|--|-----|------|--|------|------|------|------|

---

Notes:  $n=4,841$ ; Weighted column percentages are presented; Percentages may not add up to 100.0 due to rounding; \* $P<0.05$ ; \*\* $P<0.01$ ; \*\*\* $P<0.001$ .
